# Supplementary material for: Over-Detection of Melanoma-Suspect Lesions by a CE-Certified Smartphone App: Performance in Comparison to Dermatologists, 2D and 3D Convolutional Neural Networks in a Prospective Data Set of 1204 Pigmented Skin Lesions Involving Patients’ Perception
Source: MDPI journal article supplement (doi:10.3390/cancers14153829), 2022-08-07
Supplement: s1 [file s1]

## Supplementary Material

**Table S1.** Combination of all risk assessments of 1,204 pigmented skin lesions by the smartphone app SkinVision®, 2D imaging FotoFinder ATBM®, 3D imaging Vectra® WB360, dermatologists and dermatologist in combination with knowledge of FotoFinder ATBM®, and Vectra® WB360 AI-scores.

| Characteristic                                                                                                                                    | N = 1,204 <sup>1</sup> |
|---------------------------------------------------------------------------------------------------------------------------------------------------|------------------------|
| <b>overall</b>                                                                                                                                    |                        |
| SkinVision®: benign FotoFinder ATBM®: benign Vectra® WB360: benign First Evaluation <sup>2</sup> : benign Second Evaluation <sup>3</sup> : benign | 936 (78%)              |
| SkinVision®: benign FotoFinder ATBM®: benign Vectra® WB360: benign First Evaluation: suspicious Second Evaluation: suspicious                     | 1 (<0.1%)              |
| SkinVision®: benign FotoFinder ATBM®: benign Vectra® WB360: suspicious First Evaluation: benign Second Evaluation: benign                         | 14 (1.2%)              |
| SkinVision®: benign FotoFinder ATBM®: suspicious Vectra® WB360: benign First Evaluation: benign Second Evaluation: benign                         | 25 (2.1%)              |
| SkinVision®: benign FotoFinder ATBM®: suspicious Vectra® WB360: suspicious First Evaluation: benign Second Evaluation: benign                     | 2 (0.2%)               |
| SkinVision®: benign FotoFinder ATBM®: suspicious Vectra® WB360: suspicious First Evaluation: benign Second Evaluation: suspicious                 | 1 (<0.1%)              |
| SkinVision®: benign FotoFinder ATBM®: suspicious Vectra® WB360: suspicious First Evaluation: suspicious Second Evaluation: suspicious             | 1 (<0.1%)              |
| SkinVision®: suspicious FotoFinder ATBM®: benign Vectra® WB360: benign First Evaluation: benign Second Evaluation: benign                         | 193 (16%)              |
| SkinVision®: suspicious FotoFinder ATBM®: benign Vectra® WB360: benign First Evaluation: suspicious Second Evaluation: suspicious                 | 1 (<0.1%)              |
| SkinVision®: suspicious FotoFinder ATBM®: benign Vectra® WB360: suspicious First Evaluation: benign Second Evaluation: benign                     | 11 (0.9%)              |
| SkinVision®: suspicious FotoFinder: benign Vectra® WB360: suspicious First Evaluation: suspicious Second Evaluation: suspicious                   | 1 (<0.1%)              |
| SkinVision®: suspicious FotoFinder ATBM®: suspicious Vectra® WB360: benign First Evaluation: benign Second Evaluation: benign                     | 7 (0.6%)               |
| SkinVision®: suspicious FotoFinder ATBM®: suspicious Vectra® WB360: benign First Evaluation: benign Second Evaluation: suspicious                 | 1 (<0.1%)              |
| SkinVision®: suspicious FotoFinder ATBM®: suspicious Vectra® WB360: benign First Evaluation: suspicious Second Evaluation: suspicious             | 1 (<0.1%)              |
| SkinVision®: suspicious FotoFinder: suspicious Vectra® WB360: suspicious First Evaluation: benign Second Evaluation: benign                       | 4 (0.3%)               |
| SkinVision®: suspicious FotoFinder ATBM®: suspicious Vectra® WB360: suspicious First Evaluation: benign Second Evaluation: suspicious             | 1 (<0.1%)              |
| SkinVision®: suspicious FotoFinder ATBM®: suspicious Vectra® WB360: suspicious First Evaluation: suspicious Second Evaluation: suspicious         | 4 (0.3%)               |

<sup>1</sup>n (%); <sup>2</sup> First Evaluation = Dermatologist alone; <sup>3</sup> Second Evaluation = Dermatologist in combination with knowledge of 2D and 3D AI-scores

**Table S2.** Patients' preference for skin cancer screening and their assessment of the AI-based smartphone app SkinVision®, 2D imaging FotoFinder ATBM®, and 3D imaging Vectra® WB360 compared to dermatologists.

| Characteristic                                                         | N   | Patients with melanoma, N = 59 <sup>1</sup> | Patients at high-risk for melanoma, N = 55 <sup>1</sup> | p-value <sup>2</sup> |
|------------------------------------------------------------------------|-----|---------------------------------------------|---------------------------------------------------------|----------------------|
| <b>A personal mole examination by the dermatologist makes me feel:</b> | 114 |                                             |                                                         | 0.9                  |
| 0 = not safe; 10 = very safe                                           |     |                                             |                                                         |                      |
| 0                                                                      |     | 0 (0%)                                      | 0 (0%)                                                  |                      |
| 1                                                                      |     | 0 (0%)                                      | 0 (0%)                                                  |                      |
| 2                                                                      |     | 0 (0%)                                      | 0 (0%)                                                  |                      |
| 3                                                                      |     | 0 (0%)                                      | 0 (0%)                                                  |                      |
| 4                                                                      |     | 0 (0%)                                      | 0 (0%)                                                  |                      |
| 5                                                                      |     | 0 (0%)                                      | 0 (0%)                                                  |                      |
| 6                                                                      |     | 0 (0%)                                      | 0 (0%)                                                  |                      |
| 7                                                                      |     | 3 (5.1%)                                    | 4 (7.3%)                                                |                      |
| 8                                                                      |     | 15 (25%)                                    | 11 (20%)                                                |                      |
| 9                                                                      |     | 10 (17%)                                    | 10 (18%)                                                |                      |
| 10                                                                     |     | 31 (53%)                                    | 30 (55%)                                                |                      |
| <b>A sole examination with the smartphone app makes me feel:</b>       | 114 |                                             |                                                         | 0.7                  |
| 0 = not safe; 10 = very safe                                           |     |                                             |                                                         |                      |
| 0                                                                      |     | 3 (5.1%)                                    | 3 (5.5%)                                                |                      |
| 1                                                                      |     | 3 (5.1%)                                    | 2 (3.6%)                                                |                      |
| 2                                                                      |     | 7 (12%)                                     | 7 (13%)                                                 |                      |
| 3                                                                      |     | 6 (10%)                                     | 5 (9.1%)                                                |                      |
| 4                                                                      |     | 3 (5.1%)                                    | 6 (11%)                                                 |                      |
| 5                                                                      |     | 8 (14%)                                     | 6 (11%)                                                 |                      |
| 6                                                                      |     | 8 (14%)                                     | 7 (13%)                                                 |                      |
| 7                                                                      |     | 4 (6.8%)                                    | 7 (13%)                                                 |                      |
| 8                                                                      |     | 6 (10%)                                     | 3 (5.5%)                                                |                      |
| 9                                                                      |     | 4 (6.8%)                                    | 0 (0%)                                                  |                      |
| 10                                                                     |     | 7 (12%)                                     | 9 (16%)                                                 |                      |
| <b>Preference for mole assessment</b>                                  | 114 |                                             |                                                         | 0.6                  |
| Physician assessment                                                   |     | 6 (10%)                                     | 5 (9.1%)                                                |                      |
| 2D imaging assessment                                                  |     | 0 (0%)                                      | 0 (0%)                                                  |                      |
| 3D imaging assessment                                                  |     | 1 (1.7%)                                    | 3 (5.5%)                                                |                      |
| Smartphone app assessment                                              |     | 0 (0%)                                      | 0 (0%)                                                  |                      |
| A combination of physician assessment and 2D imaging assessment        |     | 17 (29%)                                    | 10 (18%)                                                |                      |
| A combination of physician assessment and 3D imaging assessment        |     | 30 (51%)                                    | 35 (64%)                                                |                      |
| A combination of physician assessment and Smartphone App assessment    |     | 2 (3.4%)                                    | 1 (1.8%)                                                |                      |
| I don't know                                                           |     | 2 (3.4%)                                    | 1 (1.8%)                                                |                      |
| No answer                                                              |     | 1 (1.7%)                                    | 0 (0%)                                                  |                      |

| Characteristic                                                                    | N   | Patients with melanoma, N = 59 <sup>1</sup> | Patients at high-risk for melanoma, N = 55 <sup>1</sup> | p-value <sup>2</sup> |
|-----------------------------------------------------------------------------------|-----|---------------------------------------------|---------------------------------------------------------|----------------------|
| <b>The following examination has reduced my fear of developing skin cancer:</b>   | 114 |                                             |                                                         | 0.8                  |
| <b>Smartphone app assessment</b>                                                  |     |                                             |                                                         |                      |
| Yes                                                                               |     | 19 (32%)                                    | 18 (33%)                                                |                      |
| No                                                                                |     | 16 (27%)                                    | 11 (20%)                                                |                      |
| I don't know                                                                      |     | 19 (32%)                                    | 19 (35%)                                                |                      |
| No answer                                                                         |     | 5 (8.5%)                                    | 7 (13%)                                                 |                      |
| <b>Dermatologist assessment</b>                                                   | 114 |                                             |                                                         | 0.4                  |
| Yes                                                                               |     | 48 (81%)                                    | 49 (89%)                                                |                      |
| No                                                                                |     | 6 (10%)                                     | 1 (1.8%)                                                |                      |
| I don't know                                                                      |     | 3 (5.1%)                                    | 3 (5.5%)                                                |                      |
| No answer                                                                         |     | 2 (3.4%)                                    | 2 (3.6%)                                                |                      |
| <b>2D TBP assessment</b>                                                          | 114 |                                             |                                                         | 0.4                  |
| Yes                                                                               |     | 45 (76%)                                    | 43 (78%)                                                |                      |
| No                                                                                |     | 5 (8.5%)                                    | 1 (1.8%)                                                |                      |
| I don't know                                                                      |     | 6 (10%)                                     | 6 (11%)                                                 |                      |
| No answer                                                                         |     | 3 (5.1%)                                    | 5 (9.1%)                                                |                      |
| <b>3D TBP assessment</b>                                                          | 114 |                                             |                                                         | 0.5                  |
| Yes                                                                               |     | 44 (75%)                                    | 45 (82%)                                                |                      |
| No                                                                                |     | 5 (8.5%)                                    | 1 (1.8%)                                                |                      |
| I don't know                                                                      |     | 7 (12%)                                     | 6 (11%)                                                 |                      |
| No answer                                                                         |     | 3 (5.1%)                                    | 3 (5.5%)                                                |                      |
| <b>The following examination has increased my fear of developing skin cancer:</b> | 114 |                                             |                                                         | >0.9                 |
| <b>Smartphone app assessment</b>                                                  |     |                                             |                                                         |                      |
| Yes                                                                               |     | 0 (0%)                                      | 1 (1.8%)                                                |                      |
| No                                                                                |     | 49 (83%)                                    | 44 (80%)                                                |                      |
| I don't know                                                                      |     | 5 (8.5%)                                    | 5 (9.1%)                                                |                      |
| No answer                                                                         |     | 5 (8.5%)                                    | 5 (9.1%)                                                |                      |
| <b>Dermatologist assessment</b>                                                   | 114 |                                             |                                                         | 0.4                  |
| Yes                                                                               |     | 0 (0%)                                      | 0 (0%)                                                  |                      |
| No                                                                                |     | 58 (98%)                                    | 52 (95%)                                                |                      |
| I don't know                                                                      |     | 1 (1.7%)                                    | 2 (3.6%)                                                |                      |
| No answer                                                                         |     | 0 (0%)                                      | 1 (1.8%)                                                |                      |
| <b>2D TBP assessment</b>                                                          | 114 |                                             |                                                         | 0.6                  |
| Yes                                                                               |     | 0 (0%)                                      | 0 (0%)                                                  |                      |
| No                                                                                |     | 55 (93%)                                    | 52 (95%)                                                |                      |
| I don't know                                                                      |     | 3 (5.1%)                                    | 1 (1.8%)                                                |                      |
| No answer                                                                         |     | 1 (1.7%)                                    | 2 (3.6%)                                                |                      |
| <b>3D TBP assessment</b>                                                          | 114 |                                             |                                                         | 0.6                  |
| Yes                                                                               |     | 0 (0%)                                      | 0 (0%)                                                  |                      |
| No                                                                                |     | 55 (93%)                                    | 52 (95%)                                                |                      |
| I don't know                                                                      |     | 3 (5.1%)                                    | 1 (1.8%)                                                |                      |
| No answer                                                                         |     | 1 (1.7%)                                    | 2 (3.6%)                                                |                      |

| Characteristic                                                                                                                                                                          | N   | Patients with melanoma, N = 59 <sup>1</sup> | Patients at high-risk for melanoma, N = 55 <sup>1</sup> | p-value <sup>2</sup> |
|-----------------------------------------------------------------------------------------------------------------------------------------------------------------------------------------|-----|---------------------------------------------|---------------------------------------------------------|----------------------|
| <b>With the following examination I expect a reliable result with the highest level of accuracy:</b>                                                                                    | 114 |                                             |                                                         | 0.2                  |
| <b>Smartphone app assessment</b>                                                                                                                                                        |     |                                             |                                                         |                      |
| Yes                                                                                                                                                                                     |     | 18 (31%)                                    | 9 (16%)                                                 |                      |
| No                                                                                                                                                                                      |     | 14 (24%)                                    | 21 (38%)                                                |                      |
| I don't know                                                                                                                                                                            |     | 26 (44%)                                    | 23 (42%)                                                |                      |
| No answer                                                                                                                                                                               |     | 1 (1.7%)                                    | 2 (3.6%)                                                |                      |
| <b>Dermatologist assessment</b>                                                                                                                                                         | 114 |                                             |                                                         | 0.058                |
| Yes                                                                                                                                                                                     |     | 54 (92%)                                    | 54 (98%)                                                |                      |
| No                                                                                                                                                                                      |     | 0 (0%)                                      | 1 (1.8%)                                                |                      |
| I don't know                                                                                                                                                                            |     | 5 (8.5%)                                    | 0 (0%)                                                  |                      |
| No answer                                                                                                                                                                               |     | 0 (0%)                                      | 0 (0%)                                                  |                      |
| <b>2D TBP assessment</b>                                                                                                                                                                | 114 |                                             |                                                         | 0.5                  |
| Yes                                                                                                                                                                                     |     | 51 (86%)                                    | 45 (82%)                                                |                      |
| No                                                                                                                                                                                      |     | 0 (0%)                                      | 2 (3.6%)                                                |                      |
| I don't know                                                                                                                                                                            |     | 8 (14%)                                     | 8 (15%)                                                 |                      |
| No answer                                                                                                                                                                               |     | 0 (0%)                                      | 0 (0%)                                                  |                      |
| <b>3D TBP assessment</b>                                                                                                                                                                | 114 |                                             |                                                         | 0.7                  |
| Yes                                                                                                                                                                                     |     | 52 (88%)                                    | 49 (89%)                                                |                      |
| No                                                                                                                                                                                      |     | 0 (0%)                                      | 1 (1.8%)                                                |                      |
| I don't know                                                                                                                                                                            |     | 7 (12%)                                     | 5 (9.1%)                                                |                      |
| No answer                                                                                                                                                                               |     | 0 (0%)                                      | 0 (0%)                                                  |                      |
| <b>Preference for skin cancer screening if AI can distinguishes very precisely between melanoma and harmless moles</b>                                                                  | 114 |                                             |                                                         | 0.5                  |
| If the physician is unsure, he includes the result of the artificial intelligence in his diagnosis.                                                                                     |     | 16 (27%)                                    | 13 (24%)                                                |                      |
| The diagnosis is made independently by the physician and artificial intelligence. A mole is always excised when either the physician or the artificial intelligence sees a need for it. |     | 9 (15%)                                     | 6 (11%)                                                 |                      |
| The physician alone makes the diagnosis independently of the artificial intelligence.                                                                                                   |     | 0 (0%)                                      | 1 (1.8%)                                                |                      |
| The physician always takes into account the result of the artificial intelligence in his diagnosis.                                                                                     |     | 32 (54%)                                    | 35 (64%)                                                |                      |
| No answer                                                                                                                                                                               |     | 2 (3.4%)                                    | 0 (0%)                                                  |                      |

<sup>1</sup>n (%); <sup>2</sup>Fisher's exact test; Pearson's Chi-squared test; TBP = total body photography; AI = artificial intelligence

**Table S3.** Dermatologists' perspective of smartphone apps for melanoma screening.

| Characteristic                                                    | N = 114 <sup>1</sup><br>skin cancer<br>screenings |
|-------------------------------------------------------------------|---------------------------------------------------|
| <b>Increased diagnostic confidence through the smartphone app</b> |                                                   |
| Yes                                                               | 6 (5.3%)                                          |
| No                                                                | 107 (94%)                                         |
| No answer                                                         | 1 (0.9%)                                          |
| <b>Trustworthiness of the smartphone app</b>                      |                                                   |
| Yes                                                               | 10 (8.8%)                                         |
| No                                                                | 103 (90%)                                         |
| No answer                                                         | 1 (0.9%)                                          |

<sup>1</sup>n (%)

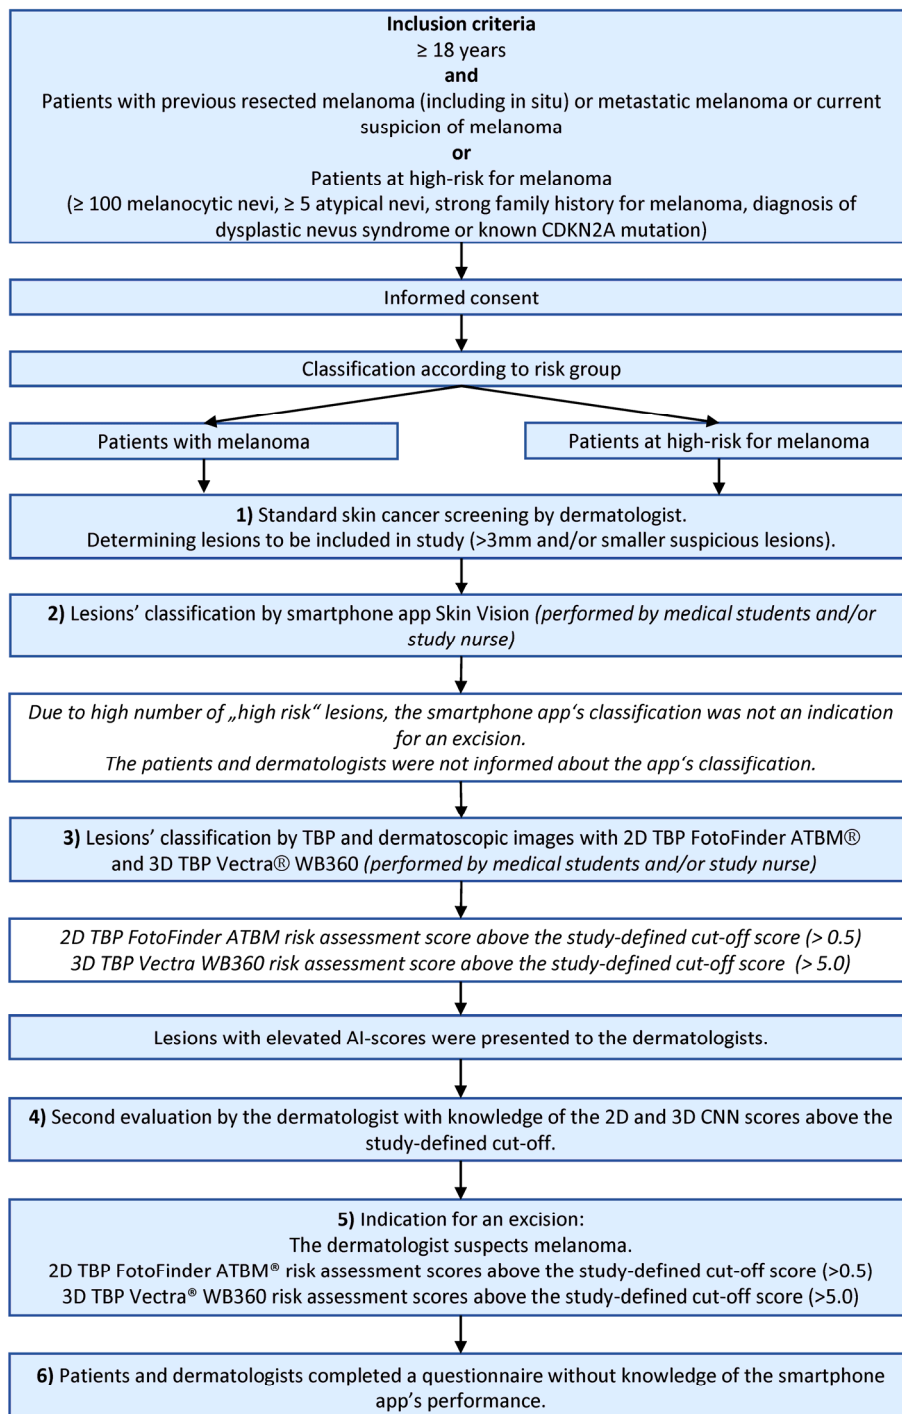

**Figure S1.** Flowchart of the study procedures. CNN = Convolutional neural network, TBP = Total body photography, AI = Artificial intelligence.
